# Supplementary material
Source: Springer Nature journal article supplement (https://www.springermedizin.de/resource/supplementary/12885_2013_4689_MOESM4_ESM.pdf/9467038)
Supplement: MOESM4 [file 9467038]

## Supplemental Figure 4

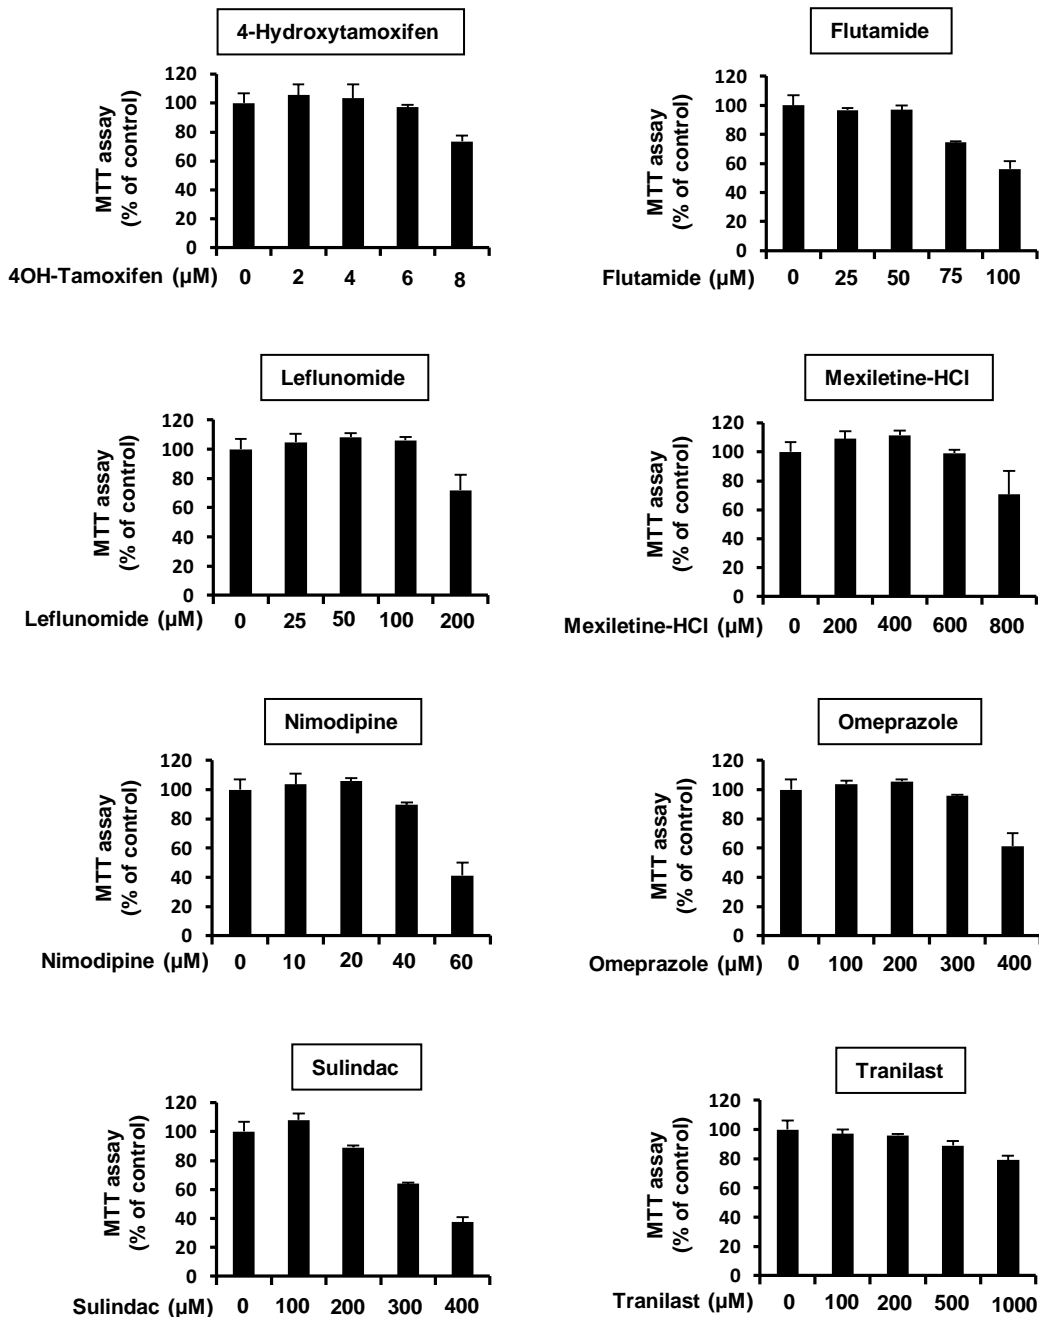

**Figure S4.** Growth inhibition. MDA-MB-231 cells were treated with DMSO, different concentrations of AHR-active pharmaceuticals for 24 hr, and cell growth was determined using MTT assay as outlined in the Materials and Methods. Results are expressed as means  $\pm$  SE for at least 3 replicate determinations.
